# Supplementary material
Source: PubMed Central journal article supplement (PMC5085073)

## Supplementary data

Table e-1: Meta-regression analyses

| Domain | Variable               | <i>k</i> | <i>B</i> | <i>SE</i> | <i>Z</i> | <i>p</i> |
|--------|------------------------|----------|----------|-----------|----------|----------|
| ToM    | Age                    | 13       | -0.0123  | 0.0097    | -1.27    | .203     |
|        | Male (%)               | 12       | -0.0040  | 0.0115    | -0.35    | .725     |
|        | Years of education     | 9        | -0.0893  | 0.0594    | -1.50    | .133     |
|        | Disease duration       | 12       | -0.0278  | 0.0232    | -1.20    | .231     |
|        | Progressive course (%) | 12       | -0.0066  | 0.0048    | -1.37    | .172     |
|        | EDSS                   | 8        | -0.0020  | 0.0890    | -0.02    | .982     |
| FER    | Age                    | 13       | -0.0314  | 0.0122    | -2.56    | .010     |
|        | Male (%)               | 12       | 0.0063   | 0.0063    | 1.00     | .318     |
|        | Years of education     | 12       | 0.0220   | 0.0697    | 0.32     | .753     |
|        | Disease duration       | 12       | -0.0520  | 0.0303    | -1.72    | .086     |
|        | Progressive course (%) | 12       | -0.0043  | 0.0028    | -1.52    | .129     |
|        | EDSS                   | 10       | -0.1129  | 0.0615    | -1.84    | .066     |

**Note:** *p*-values are two-tailed

**Abbreviations:** *B*: coefficient; EDSS: Expanded Disability Status Scale; FER: Facial emotion recognition; *k*: number of studies; ToM: Theory of mind

Figure e-1: Theory of Mind meta-regression scatterplots

**Age**

**% Male**

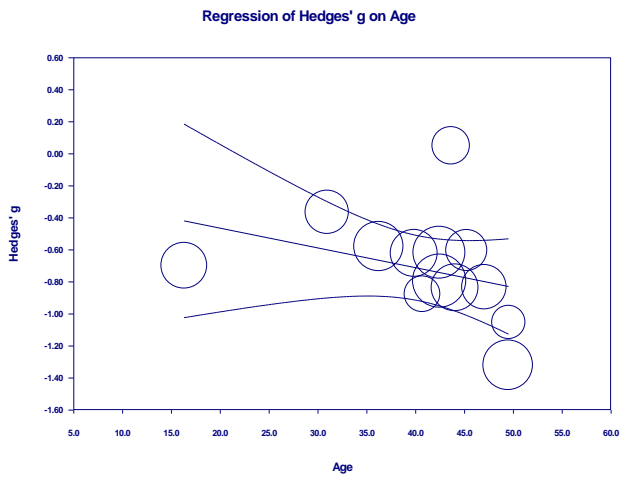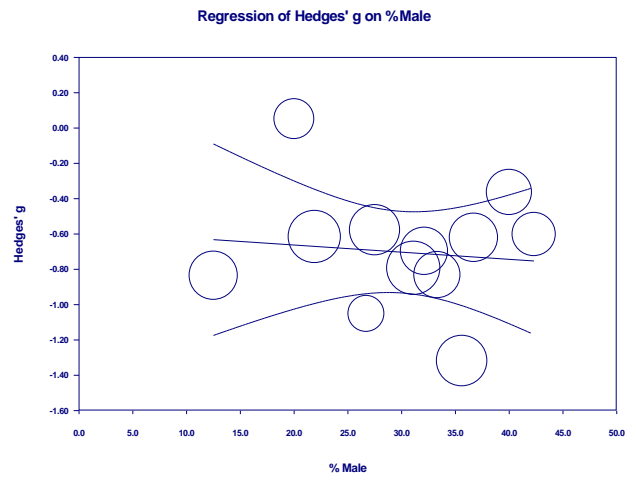

**Years of education**

**Disease duration**

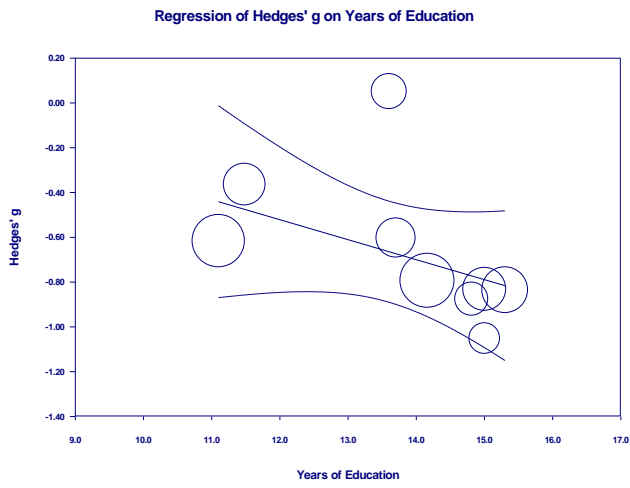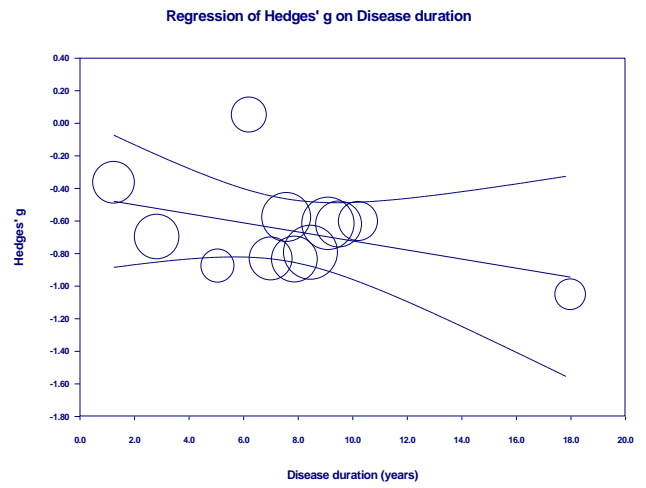

**% Progressive disease course**

**EDSS**

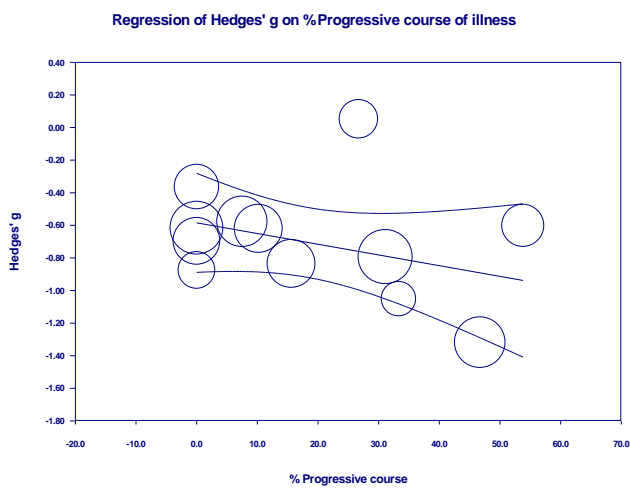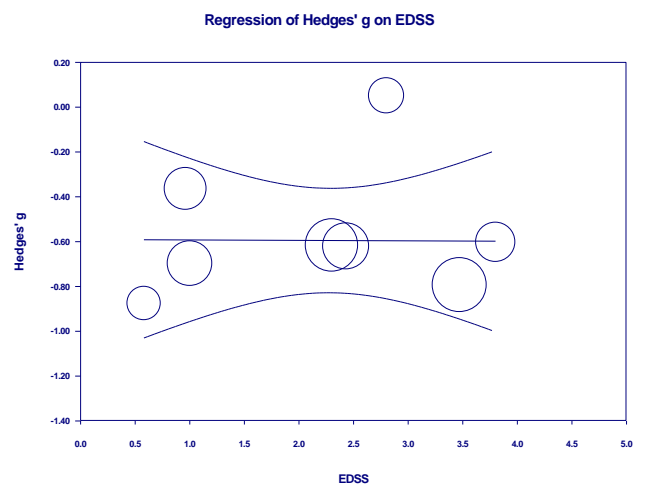

Figure e-2: Facial emotion recognition meta-regression scatterplots

**Age**

**% Male**

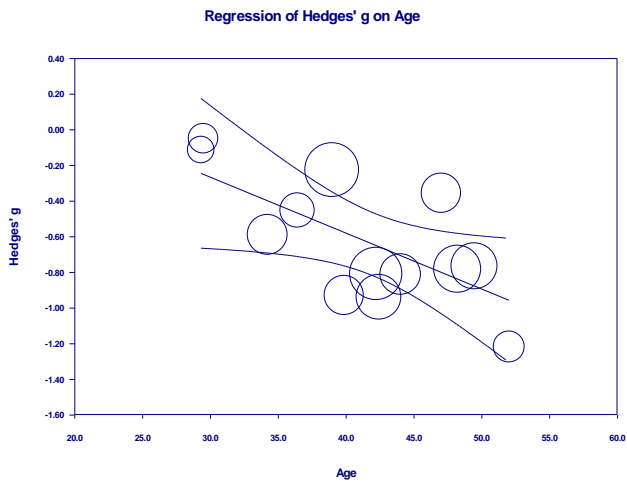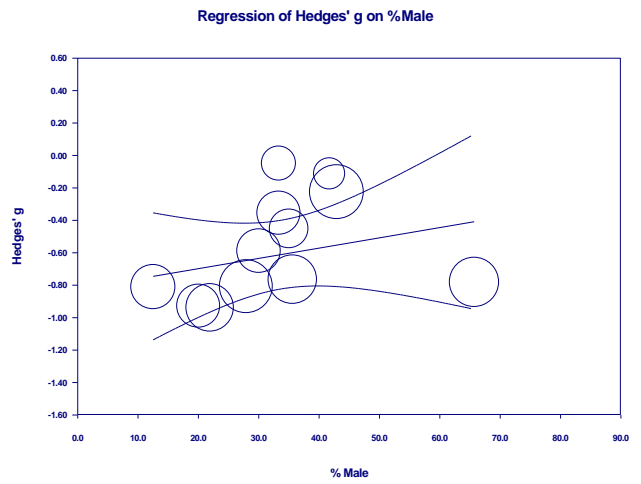

**Years of education**

**Disease duration**

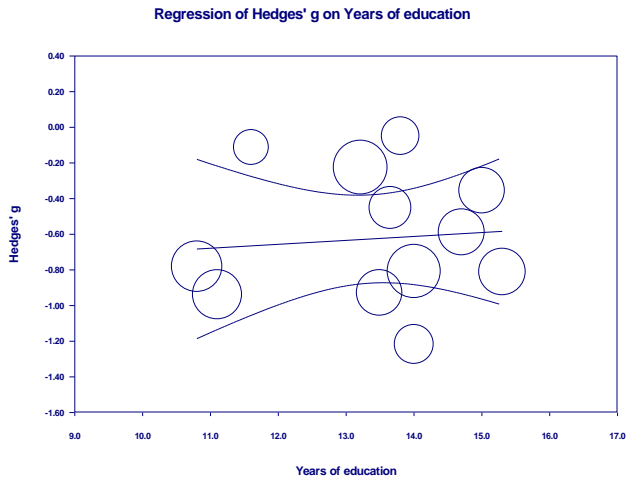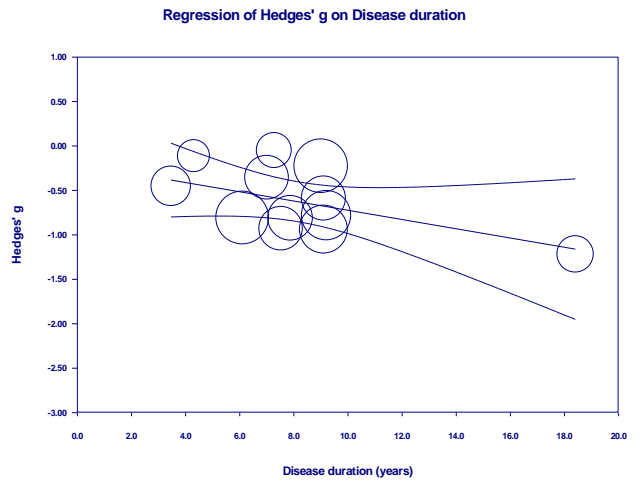

**% Progressive disease course**

**EDSS**

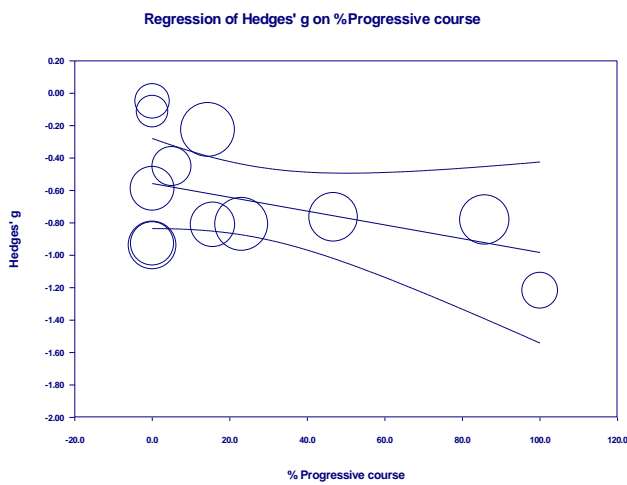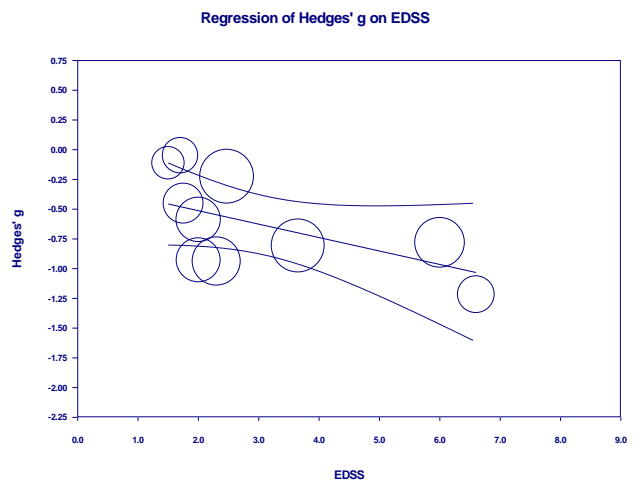

Figure e-3: Funnel plots for overall analyses

*Theory of Mind*

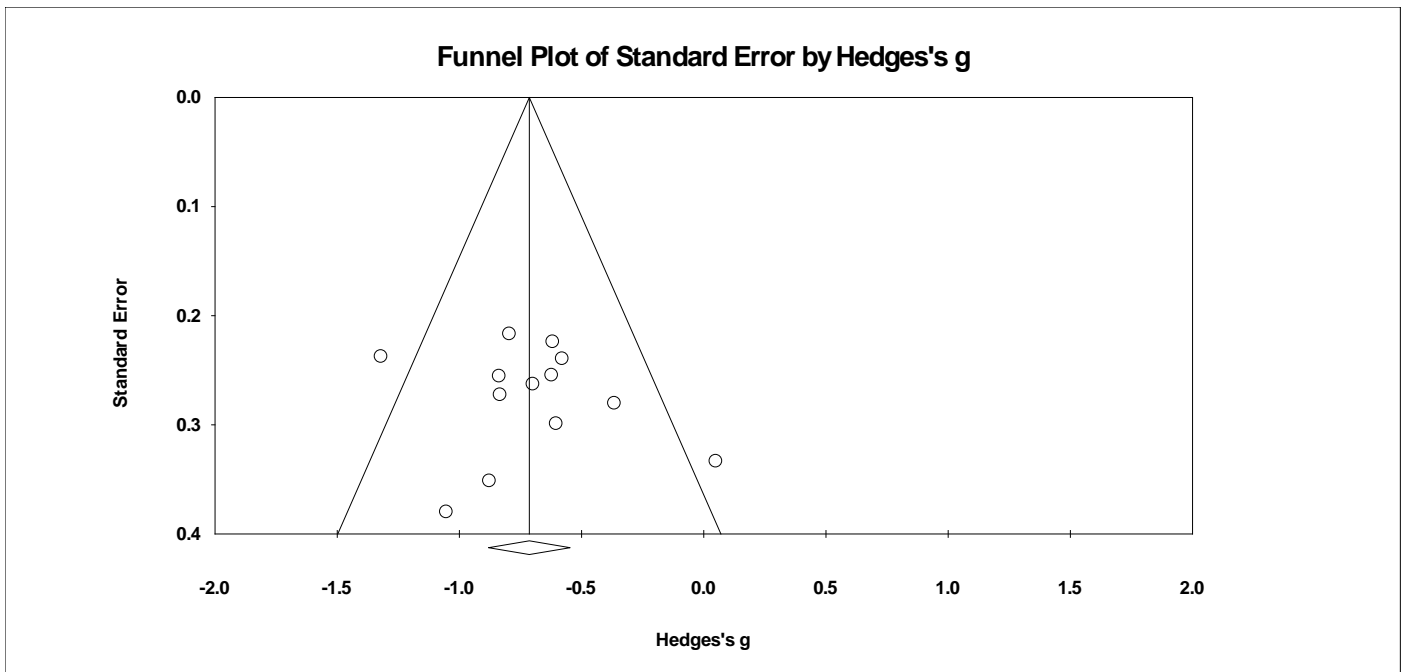

*Facial emotion recognition*

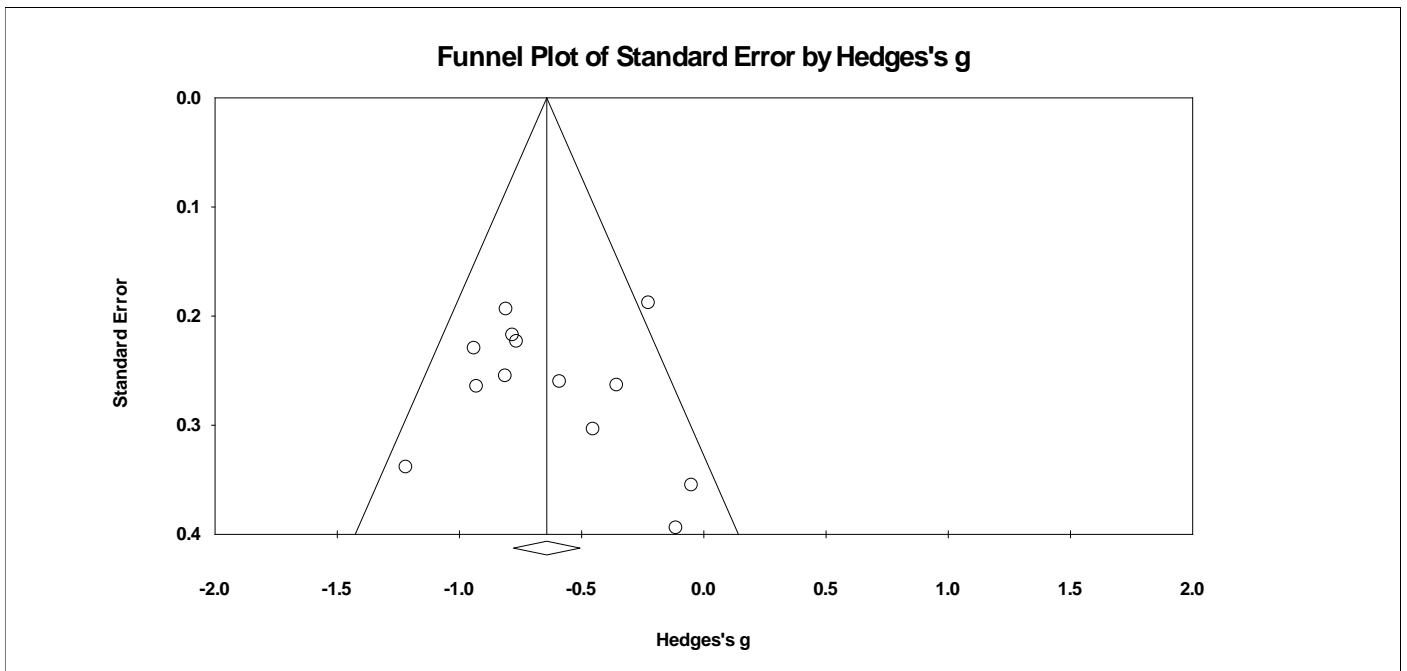

Supplement: supp_WNL.0000000000003236_Supplemental_data.pdf [file supp_WNL.0000000000003236_Supplemental_data.pdf]
